# Supplementary material for: Single-indicator-based Multidimensional Sensing: Detection and Identification of Heavy Metal Ions and Understanding the Foundations from Experiment to Simulation
Source: PubMed Central journal article supplement (PMC4857083; doi:10.1038/srep25354), 2016-05-05
Supplement: srep25354-s1.pdf [file srep25354-s1.pdf]

# Supplementary Information

## Single-indicator-based Multidimensional Sensing: Detection and Identification of Heavy Metal Ions and Understanding the Foundations from Experiment to Simulation

Yumin Leng<sup>1,2</sup>, Sihua Qian<sup>1</sup>, Yuhui Wang<sup>1,\*</sup>, Cheng Lu<sup>2</sup>, Xiaoxu Ji<sup>2</sup>, Zhiwen Lu<sup>2</sup> &  
Hengwei Lin<sup>1,\*</sup>

<sup>1</sup>Ningbo Institute of Materials Technology & Engineering (NIMTE), Chinese Academy of Sciences, Ningbo 315201, China

<sup>2</sup>College of Physics and Electronic Engineering, Nanyang Normal University, Nanyang 473061, China

\*E-mail: [linhengwei@nimte.ac.cn](mailto:linhengwei@nimte.ac.cn)

## Supporting Figures

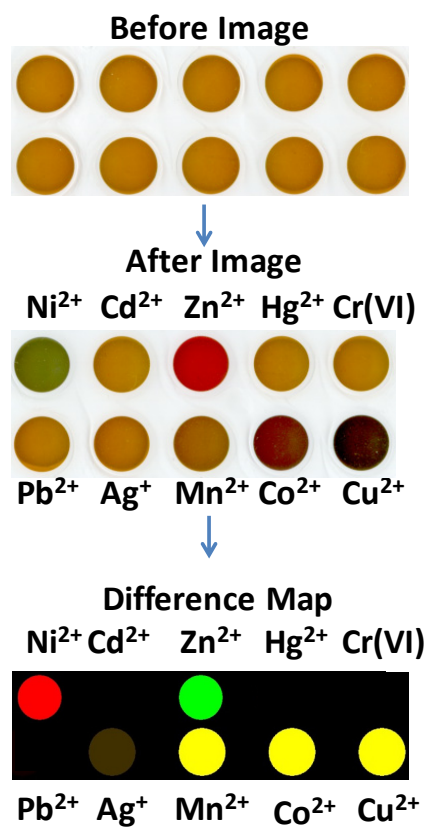

**Figure S1.** Color images of the dithizone solution before and after exposure to ten heavy metal ions at standard concentrations of wastewater-discharge of China (see Table S1). For purposes of visualization, the color range of the map was expanded from 4 to 8 bits per color (RGB range of 4–19 expanded to 0–255).

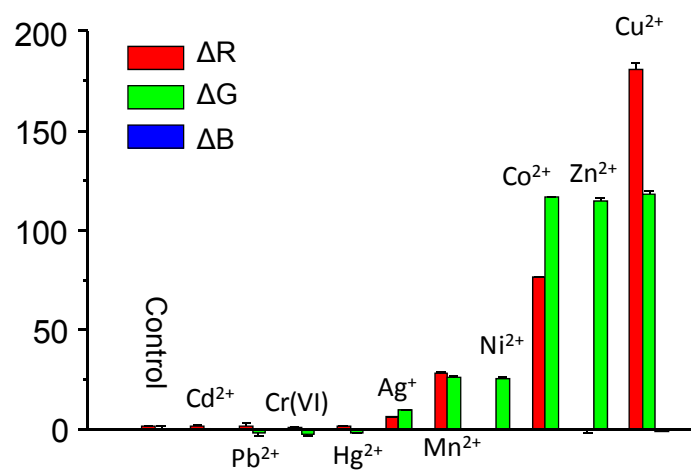

**Figure S2.** The RGB alterations (fingerprints) of the dithizone solution to ten heavy metal ions at their wastewater-discharge standard concentrations of China and a control. All experiments were run in triplicate. Control, Cd<sup>2+</sup>, Pb<sup>2+</sup>, Cr(VI) and Hg<sup>2+</sup> cannot be differentiated.

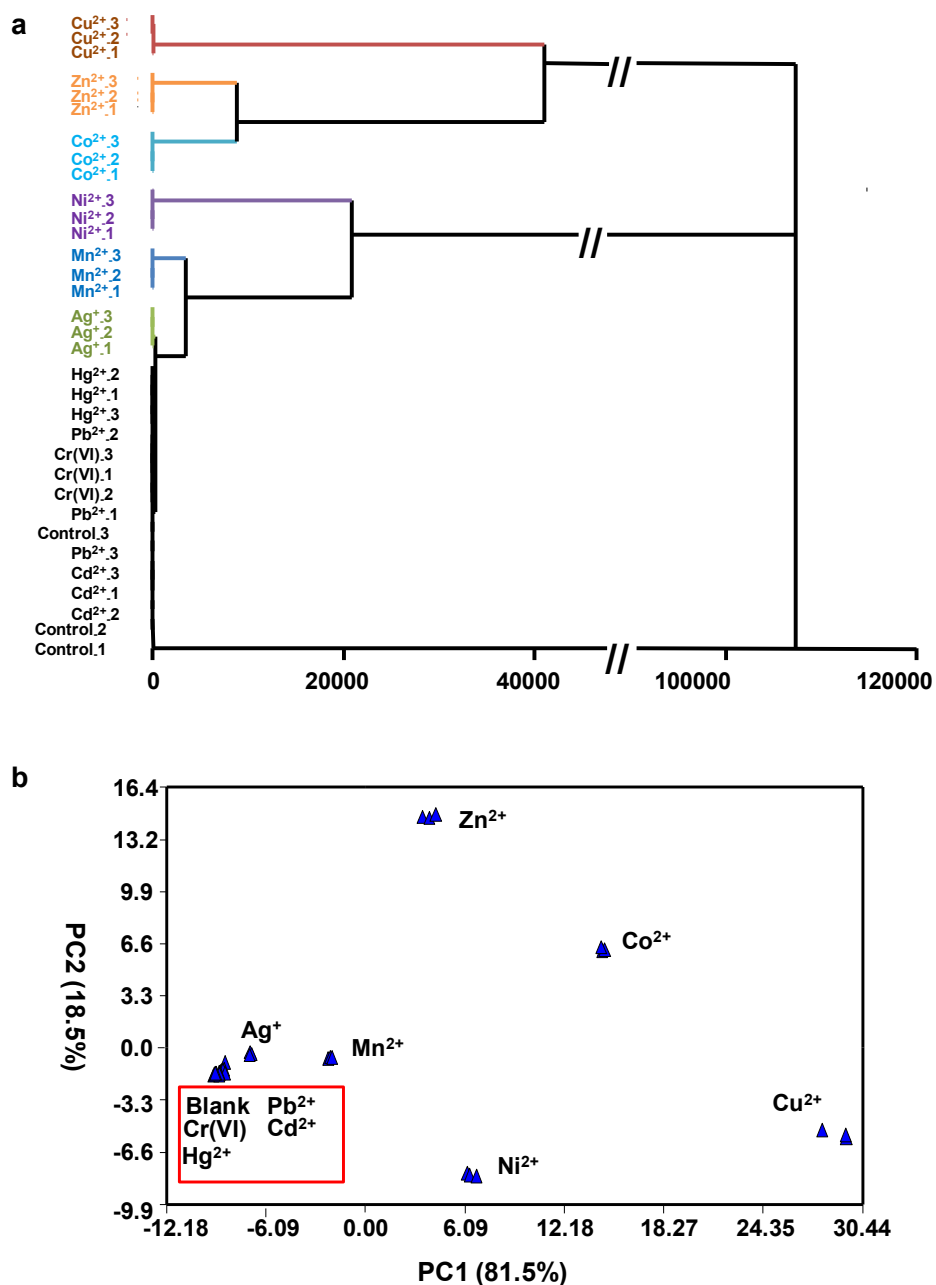

**Figure S3.** (a) HCA, and (b) PCA for the dithizone solution analysis of ten heavy metal ions at wastewater-discharge standard concentrations of China and a control based on the  $\Delta RGB$  values obtained from the “before” and “after” images. All experiments were run in triplicate. Confusions of Control, Cd<sup>2+</sup>, Pb<sup>2+</sup>, Cr(VI) and Hg<sup>2+</sup> in classification were observed.

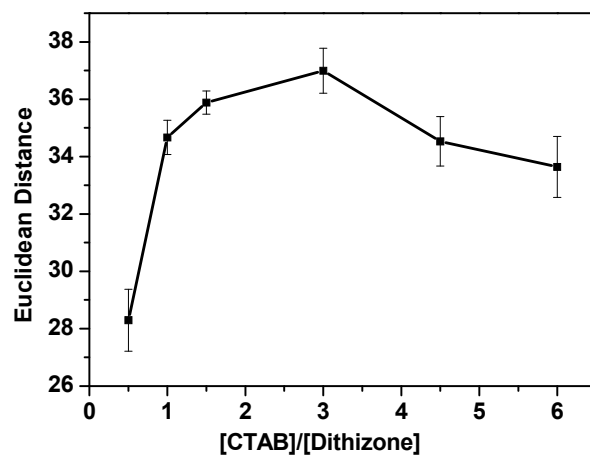

**Figure S4.** The total Euclidean distances of the dithizone solution mixed with CTAB at different ratios response to  $5 \mu\text{M Cd}^{2+}$ . The ratios of CTAB to Dithizone are 1:2, 1:1, 3:2, 3:1, 4.5:1 and 6:1. The experiments were performed in triplicate with  $30 \mu\text{M}$  dithizone and  $5 \mu\text{M Cd}^{2+}$  under physiological conditions (10 mM HEPES buffer at pH 7.4). The error bars represent the standard deviation of triplicate experiments.

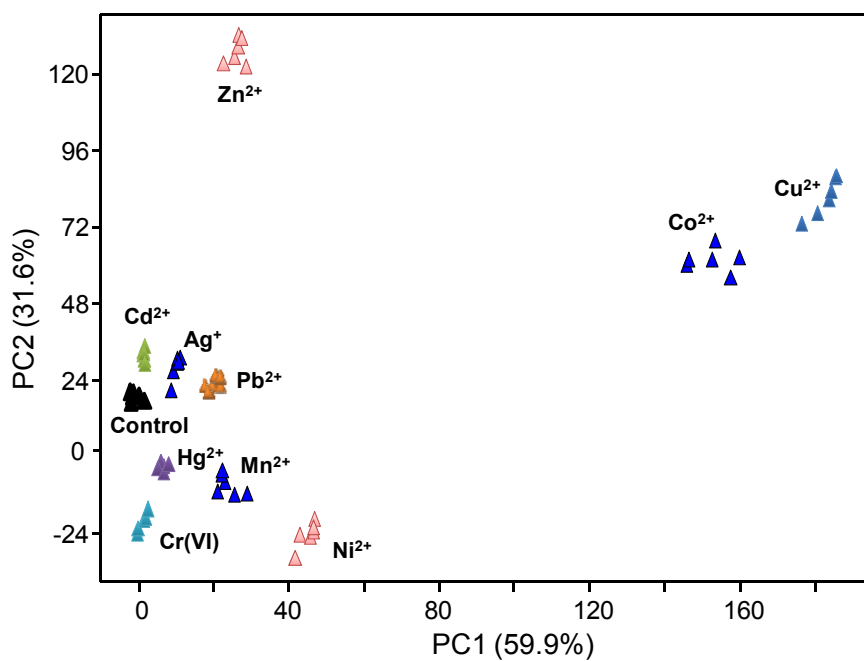

**Figure S5.** PCA score plot for the analysis of ten heavy metal ions using the as-developed single-indicator-based multidimensional sensing platform at their standard concentrations of wastewater-discharge of China.

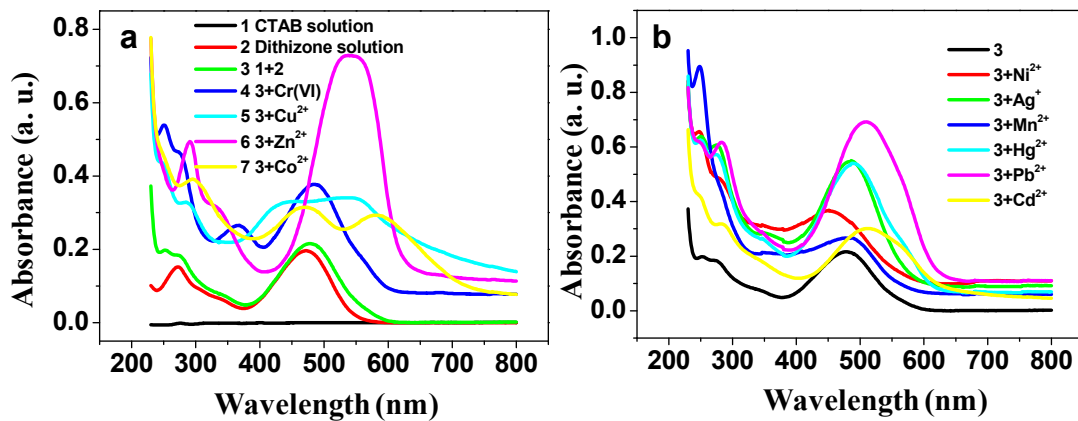

**Figure S6.** UV-vis absorption spectra of the CTAB solution, dithizone solution, their mixture, and the mixture in the presence of each of ten heavy metal ions at their wastewater-discharge standard concentrations of China.

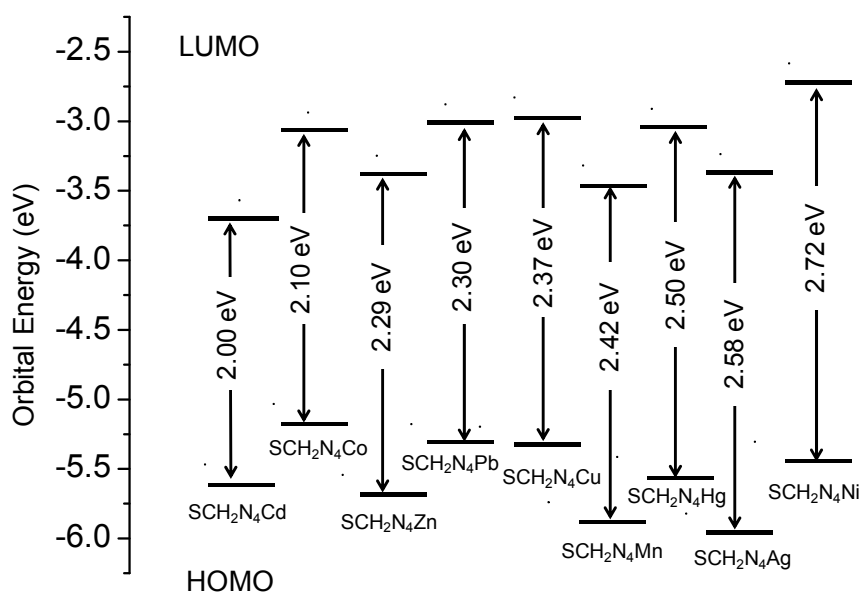

**Figure S7.** The frontier molecular orbital energies of the chelate structures of  $[\text{SCH}_2\text{N}_4]^{2-}$  and heavy metal ions, as well as the gaps between HOMO and LUMO.



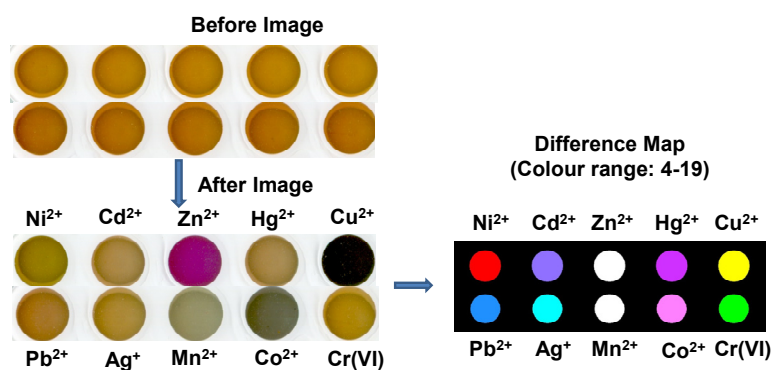

**Figure S8.** Color images of the sensor before and after exposure to ten heavy metal ions at their standard concentrations of wastewater-discharge in wastewater from Yongjiang River. For purposes of visualization, the color range of the map was expanded from 4 to 8 bits per color (RGB range of 4–19 expanded to 0–255).

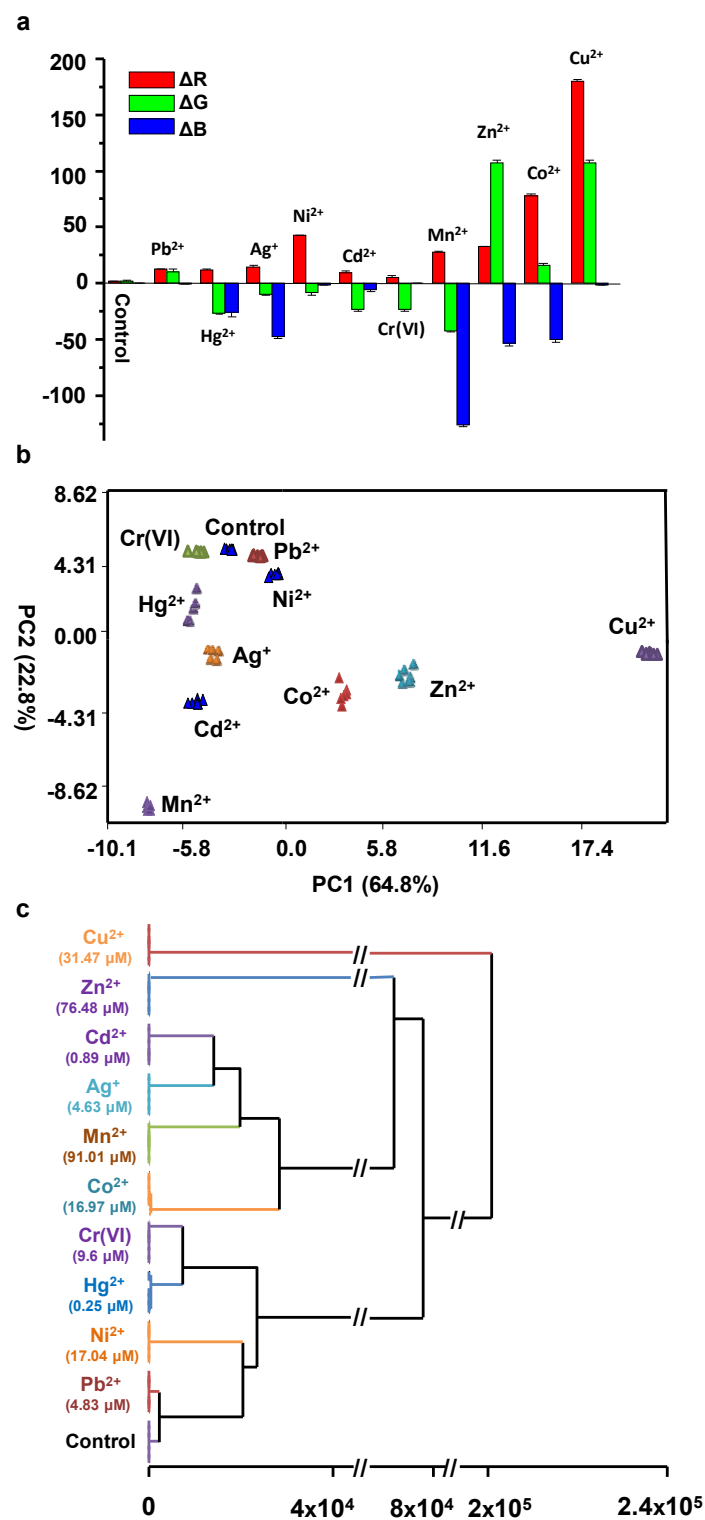

**Figure S9.** (a) Recognition patterns, (b) PCA score plot, and (c) HCA for the analysis of the ten heavy metal ions at their standard concentrations of wastewater-discharge of China in wastewater from Yongjiang River. Error bars in Figure a represent standard deviations of six parallel measurements.

## Supporting Tables

**Table S1.** Wastewater-discharge standard concentrations of China for ten heavy metal ions (referred to Chinese National Standards: Integrated Wastewater-Discharge Standard (GB8978-1996)).

| Heavy Metal Ions | Wastewater Discharge Standard |       |
|------------------|-------------------------------|-------|
|                  | mg/L                          | μM    |
| Hg <sup>2+</sup> | 0.05                          | 0.25  |
| Cd <sup>2+</sup> | 0.1                           | 0.89  |
| Pb <sup>2+</sup> | 1.0                           | 4.83  |
| Cr(VI)           | 0.5                           | 9.61  |
| Co <sup>2+</sup> | 1.0                           | 16.97 |
| Ni <sup>2+</sup> | 1.0                           | 17.04 |
| Cu <sup>2+</sup> | 2.0                           | 31.47 |
| Zn <sup>2+</sup> | 5.0                           | 76.48 |
| Mn <sup>2+</sup> | 5.0                           | 91.01 |
| Ag <sup>+</sup>  | 0.5                           | 4.63  |

**Table S2.** Database of the RGB alterations of the dithizone and CTAB mixture to ten heavy metal ions at their standard concentrations of wastewater-discharge of China and a control.

|                     | R        | G        | B       |                     | R       | G        | B         |
|---------------------|----------|----------|---------|---------------------|---------|----------|-----------|
| Control-1           | -1.7827  | 4.0975   | 0.0000  | Hg <sup>2+</sup> -1 | 6.7532  | -17.9869 | -12.6545  |
| Control-2           | -1.4054  | 5.3579   | 0.0100  | Hg <sup>2+</sup> -2 | 5.9866  | -16.4622 | -11.6322  |
| Control-3           | -2.3152  | 5.4956   | 0.0000  | Hg <sup>2+</sup> -3 | 5.8962  | -16.6566 | -9.9973   |
| Control-4           | -1.9621  | 2.1171   | -0.1477 | Hg <sup>2+</sup> -4 | 5.5632  | -18.6361 | -12.0458  |
| Control-5           | 0.0791   | 4.3592   | 0.0008  | Hg <sup>2+</sup> -5 | 6.6063  | -19.7450 | -10.8098  |
| Control-6           | 1.4959   | 2.5828   | -0.1997 | Hg <sup>2+</sup> -6 | 7.9604  | -17.0518 | -13.6988  |
| Co <sup>2+</sup> -1 | 157.2967 | 41.3338  | -1.7290 | Mn <sup>2+</sup> -1 | 28.8890 | -26.5408 | -93.7995  |
| Co <sup>2+</sup> -2 | 145.7337 | 45.3188  | -1.6677 | Mn <sup>2+</sup> -2 | 25.4102 | -26.6594 | -96.0769  |
| Co <sup>2+</sup> -3 | 159.6144 | 47.6667  | -1.6355 | Mn <sup>2+</sup> -3 | 21.0583 | -25.7631 | -97.8830  |
| Co <sup>2+</sup> -4 | 152.4157 | 47.1482  | -1.4773 | Mn <sup>2+</sup> -4 | 22.8387 | -22.8676 | -106.3502 |
| Co <sup>2+</sup> -5 | 153.2831 | 53.0550  | -1.4647 | Mn <sup>2+</sup> -5 | 22.0374 | -20.2964 | -97.6930  |
| Co <sup>2+</sup> -6 | 146.2841 | 47.1434  | -1.0668 | Mn <sup>2+</sup> -6 | 22.2165 | -19.1120 | -102.3072 |
| Ni <sup>2+</sup> -1 | 41.6290  | -46.7310 | -0.0005 | Zn <sup>2+</sup> -1 | 22.5654 | 108.6071 | -115.4632 |
| Ni <sup>2+</sup> -2 | 42.7591  | -39.3512 | -0.0681 | Zn <sup>2+</sup> -2 | 25.5225 | 110.4680 | -117.3107 |
| Ni <sup>2+</sup> -3 | 45.7272  | -40.1603 | 0.0000  | Zn <sup>2+</sup> -3 | 26.4943 | 113.7882 | -111.7714 |
| Ni <sup>2+</sup> -4 | 46.4878  | -38.2271 | 0.0000  | Zn <sup>2+</sup> -4 | 26.6338 | 117.4619 | -113.8335 |
| Ni <sup>2+</sup> -5 | 46.8490  | -34.3670 | 0.0000  | Zn <sup>2+</sup> -5 | 27.4391 | 116.6021 | -115.4069 |
| Ni <sup>2+</sup> -6 | 46.5948  | -37.0334 | -0.0048 | Zn <sup>2+</sup> -6 | 28.5800 | 107.5391 | -111.8367 |
| Cd <sup>2+</sup> -1 | 1.0766   | 17.1630  | -0.0080 | Pb <sup>2+</sup> -1 | 19.4651 | 7.9875   | -43.4527  |
| Cd <sup>2+</sup> -2 | 1.5177   | 15.5232  | 0.0000  | Pb <sup>2+</sup> -2 | 17.3851 | 7.9657   | -36.9847  |
| Cd <sup>2+</sup> -3 | 1.2534   | 18.2364  | -0.0048 | Pb <sup>2+</sup> -3 | 20.2040 | 10.9638  | -39.6546  |
| Cd <sup>2+</sup> -4 | 1.7565   | 20.0220  | 0.0000  | Pb <sup>2+</sup> -4 | 21.4657 | 7.6775   | -38.5347  |
| Cd <sup>2+</sup> -5 | 1.4531   | 17.6355  | -0.0050 | Pb <sup>2+</sup> -5 | 21.3656 | 10.5632  | -40.4516  |
| Cd <sup>2+</sup> -6 | 1.6530   | 14.2347  | 0.0000  | Pb <sup>2+</sup> -6 | 18.3426 | 5.8910   | -42.1472  |
| Cr(VI)-1            | -0.2253  | -38.9779 | 0.0018  | Ag <sup>+</sup> -1  | 8.6230  | 5.9141   | -38.2120  |
| Cr(VI)-2            | -0.1226  | -37.4544 | 0.0000  | Ag <sup>+</sup> -2  | 9.2894  | 11.9425  | -42.5157  |
| Cr(VI)-3            | 1.2929   | -34.8749 | -0.0020 | Ag <sup>+</sup> -3  | 10.2321 | 14.7259  | -47.1982  |
| Cr(VI)-4            | 1.9694   | -34.1367 | 0.0000  | Ag <sup>+</sup> -4  | 11.0598 | 16.1784  | -46.7538  |
| Cr(VI)-5            | 2.5614   | -31.3888 | -0.0038 | Ag <sup>+</sup> -5  | 10.2585 | 16.0392  | -46.1178  |
| Cr(VI)-6            | 2.5549   | -31.2542 | 0.0000  | Ag <sup>+</sup> -6  | 10.5870 | 15.0543  | -48.7737  |
| Cu <sup>2+</sup> -1 | 176.3017 | 58.1899  | -0.1625 |                     |         |          |           |
| Cu <sup>2+</sup> -2 | 180.4758 | 61.6056  | -0.0819 |                     |         |          |           |
| Cu <sup>2+</sup> -3 | 183.5685 | 65.7830  | -0.1756 |                     |         |          |           |
| Cu <sup>2+</sup> -4 | 184.0980 | 68.4635  | -0.0668 |                     |         |          |           |
| Cu <sup>2+</sup> -5 | 185.1226 | 72.9754  | -0.1861 |                     |         |          |           |
| Cu <sup>2+</sup> -6 | 185.4469 | 73.3373  | 0.0000  |                     |         |          |           |

**Table S3.** The equation and parameters for limit of detection (LOD) calculation.

| Y = A + S × X    |          |          |         |         |   |         |
|------------------|----------|----------|---------|---------|---|---------|
| Parameter        | A        | S        | R       | SD      | N | P       |
| Hg <sup>2+</sup> | 18.21118 | 12.71978 | 0.99946 | 0.56191 | 6 | <0.0001 |
| Cd <sup>2+</sup> | 9.03225  | 9.92698  | 0.99985 | 0.46991 | 6 | <0.0001 |

A = Y-intercept, S = slope, R = correlation, SD = standard deviation, N = number of data points, P = probability value.

The limit of detection (LOD) could be obtained by the above equation and parameters.

$$\text{LOD} = 3 \times \text{SD} / \text{S}$$

$$\text{LOD}_{\text{Hg}^{2+}} = 3 \times 0.56191 / 12.71978 = 0.13 \mu\text{M}$$

$$\text{LOD}_{\text{Cd}^{2+}} = 3 \times 0.46991 / 9.92698 = 0.14 \mu\text{M}$$

**Table S4.** The Cartesian coordinates of the chelate structures of  $[\text{SCH}_2\text{N}_4]^{2-}$  and different heavy metal ions.

| Conformer Å                        | X  | Y         | Z         | Conformer Å | X                                  | Y  | Z         |           |           |
|------------------------------------|----|-----------|-----------|-------------|------------------------------------|----|-----------|-----------|-----------|
| SCH <sub>2</sub> N <sub>4</sub> Ni | N  | 0.819437  | 1.352584  | -0.066088   | SCH <sub>2</sub> N <sub>4</sub> Pb | N  | -0.200790 | 1.428472  | 0.481742  |
|                                    | H  | 1.053446  | 2.156162  | 0.520918    |                                    | H  | -0.048247 | 2.230589  | 1.088389  |
|                                    | N  | -0.545011 | 1.132531  | 0.099376    |                                    | N  | -1.574376 | 1.225206  | 0.341824  |
|                                    | H  | -1.133990 | 1.953322  | -0.000124   |                                    | H  | -2.108798 | 2.013206  | -0.018268 |
|                                    | C  | -1.251459 | -0.029665 | 0.058224    |                                    | C  | -2.210777 | 0.041724  | 0.211127  |
|                                    | S  | -2.919086 | -0.060615 | -0.063681   |                                    | S  | -3.698080 | -0.144948 | -0.504844 |
|                                    | N  | -0.513062 | -1.253435 | 0.104590    |                                    | N  | -1.566211 | -1.084980 | 0.826553  |
|                                    | N  | 0.703660  | -1.284758 | 0.059224    |                                    | N  | -0.410875 | -1.404020 | 0.557582  |
|                                    | Ni | 1.822840  | -0.092504 | -0.043963   |                                    | Pb | 1.229960  | -0.040582 | -0.118455 |
| SCH <sub>2</sub> N <sub>4</sub> Mn | N  | 0.833004  | 1.339535  | 0.000728    | SCH <sub>2</sub> N <sub>4</sub> Hg | N  | -0.216010 | 1.432585  | 0.879520  |
|                                    | H  | 1.020084  | 2.285916  | 0.325307    |                                    | H  | 0.162655  | 2.389670  | 1.226128  |
|                                    | N  | -0.535510 | 1.126256  | 0.059738    |                                    | N  | -1.478792 | 1.273368  | 0.359615  |
|                                    | H  | -1.132976 | 1.939181  | -0.037443   |                                    | H  | -1.954591 | 2.058060  | -0.087305 |
|                                    | C  | -1.214712 | -0.060326 | 0.033601    |                                    | C  | -2.164375 | 0.129333  | 0.238597  |
|                                    | S  | -2.892447 | -0.066905 | -0.051123   |                                    | S  | -3.454750 | -0.177494 | -0.743510 |
|                                    | N  | -0.487904 | -1.260202 | 0.092649    |                                    | N  | -1.628408 | -1.024809 | 1.071788  |
|                                    | N  | 0.756085  | -1.248592 | 0.055724    |                                    | N  | -0.514629 | -1.415861 | 1.021691  |
|                                    | Mn | 1.988824  | -0.099666 | -0.045335   |                                    | Hg | 1.215555  | -0.053010 | -0.175032 |
| SCH <sub>2</sub> N <sub>4</sub> Co | N  | 0.809927  | 1.385462  | 0.060691    | SCH <sub>2</sub> N <sub>4</sub> Cd | N  | 0.214025  | 1.397214  | 0.845019  |
|                                    | H  | 1.061848  | 2.050550  | 0.778090    |                                    | H  | 0.288473  | 2.346655  | 1.208358  |
|                                    | N  | -0.554999 | 1.156140  | 0.165110    |                                    | N  | -1.066297 | 1.260850  | 0.362892  |
|                                    | H  | -1.135549 | 1.955132  | -0.027861   |                                    | H  | -1.547822 | 2.058929  | -0.053123 |
|                                    | C  | -1.231356 | 0.009195  | 0.111073    |                                    | C  | -1.767392 | 0.126282  | 0.241621  |
|                                    | S  | -2.860728 | -0.073772 | -0.160979   |                                    | S  | -3.091584 | -0.148208 | -0.704380 |
|                                    | N  | -0.526676 | -1.242616 | 0.300603    |                                    | N  | -1.217305 | -1.049420 | 1.034490  |
|                                    | N  | 0.665000  | -1.325299 | 0.151491    |                                    | N  | -0.109866 | -1.450400 | 0.941054  |
|                                    | Co | 1.869656  | -0.099863 | -0.132825   |                                    | Cd | 1.595524  | -0.081243 | -0.283731 |
| SCH <sub>2</sub> N <sub>4</sub> Cu | N  | 0.815616  | 1.434402  | 0.080800    | SCH <sub>2</sub> N <sub>4</sub> Ag | N  | -0.334392 | -1.297078 | 0.879106  |
|                                    | H  | 1.060682  | 2.176157  | 0.735558    |                                    | H  | -0.327843 | -0.875842 | 1.811862  |
|                                    | N  | -0.546003 | 1.172078  | 0.271012    |                                    | N  | 0.978242  | -1.184351 | 0.392492  |

|                                    |    |           |           |           |  |    |           |           |           |
|------------------------------------|----|-----------|-----------|-----------|--|----|-----------|-----------|-----------|
|                                    | H  | -1.159798 | 1.978950  | 0.174965  |  | H  | 1.313955  | -2.023446 | -0.073392 |
|                                    | C  | -1.226698 | 0.006291  | 0.139712  |  | C  | 1.755155  | -0.107532 | 0.206339  |
|                                    | S  | -2.852799 | -0.061902 | -0.228030 |  | S  | 3.196120  | -0.026921 | -0.593123 |
|                                    | N  | -0.536684 | -1.232652 | 0.432989  |  | N  | 1.231460  | 1.120872  | 0.857140  |
|                                    | N  | 0.632936  | -1.442743 | 0.192097  |  | N  | 0.250300  | 1.696383  | 0.525806  |
|                                    | Cu | 1.742863  | -0.093794 | -0.170297 |  | Ag | -1.649664 | 0.034563  | -0.256773 |
| SCH <sub>2</sub> N <sub>4</sub> Zn | N  | 0.819522  | 1.458100  | 0.319480  |  |    |           |           |           |
|                                    | H  | 1.119801  | 2.092937  | 1.054143  |  |    |           |           |           |
|                                    | N  | -0.568472 | 1.271670  | 0.409798  |  |    |           |           |           |
|                                    | H  | -1.157216 | 2.061132  | 0.138459  |  |    |           |           |           |
|                                    | C  | -1.185740 | 0.081094  | 0.247198  |  |    |           |           |           |
|                                    | S  | -2.699260 | -0.101910 | -0.409191 |  |    |           |           |           |
|                                    | N  | -0.552568 | -1.124970 | 0.759496  |  |    |           |           |           |
|                                    | N  | 0.557205  | -1.563369 | 0.484345  |  |    |           |           |           |
|                                    | Zn | 1.618340  | -0.110003 | -0.331352 |  |    |           |           |           |
